# Supplementary material for: Dynamic Regulation of GH–IGF1 Signaling in Injury and Recovery in Hyperoxia-Induced Neonatal Lung Injury
Source: MDPI journal article supplement (doi:10.3390/cells10112947), 2021-10-29
Supplement: s1 [file s1]

Supplementary Materials:

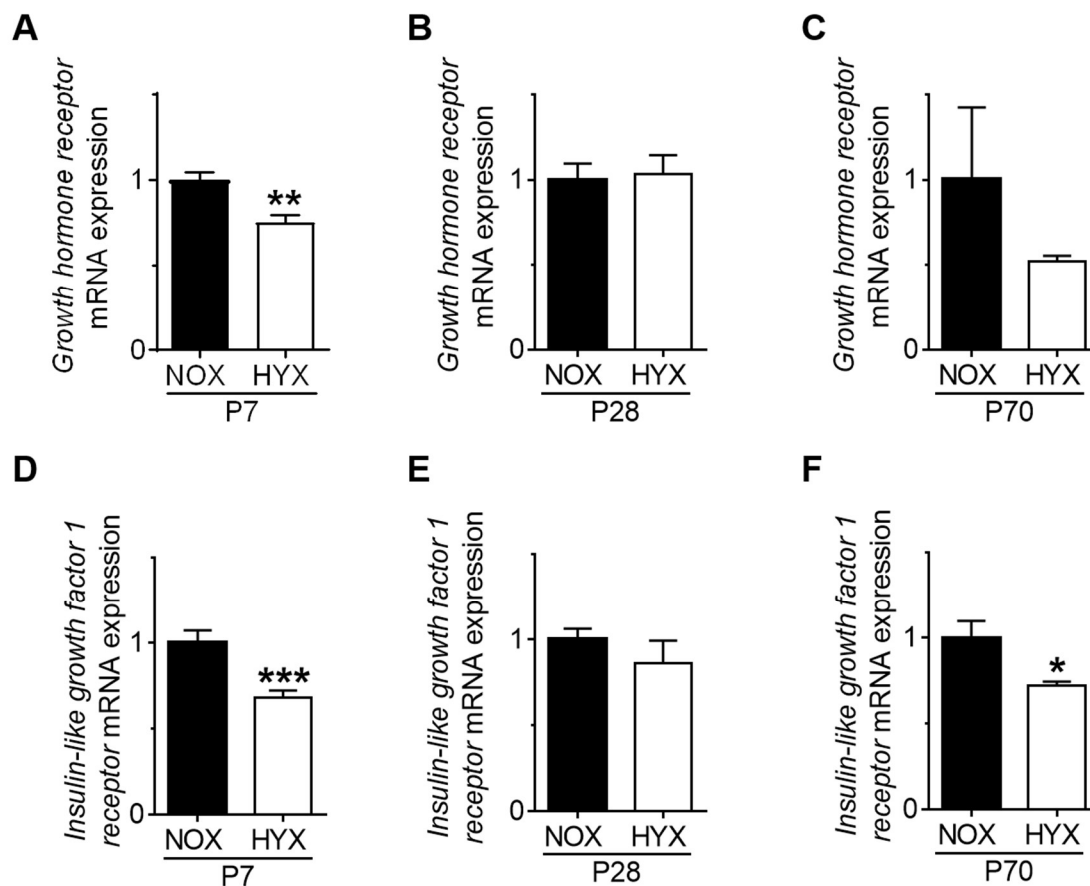

**Supplementary Figure S1.** Gene expression of growth hormone receptor (*Ghr*) and insulin-like growth factor 1 receptor (*Igf1r*) in murine lungs of mice exposed to room air (normoxia, NOX, 21 % O<sub>2</sub>) or hyperoxia (HYX, 85 % O<sub>2</sub>) from birth until postnatal day 7 (P7) or P28 using qRT-PCR. A-C: Measurement of lung *Ghr* mRNA at P7 (A), P28 (B), and P70 (C). D-F: Assessment of lung *Igf1r* mRNA at P7 (D), P28 (E), and P70 (F);  $\beta$ -Actin served as housekeeping gene. Data are presented as mean $\pm$ SEM. \*p<0.05, \*\*p<0.01, \*\*\*p<0.001 (Unpaired t test); n=10-12/group.

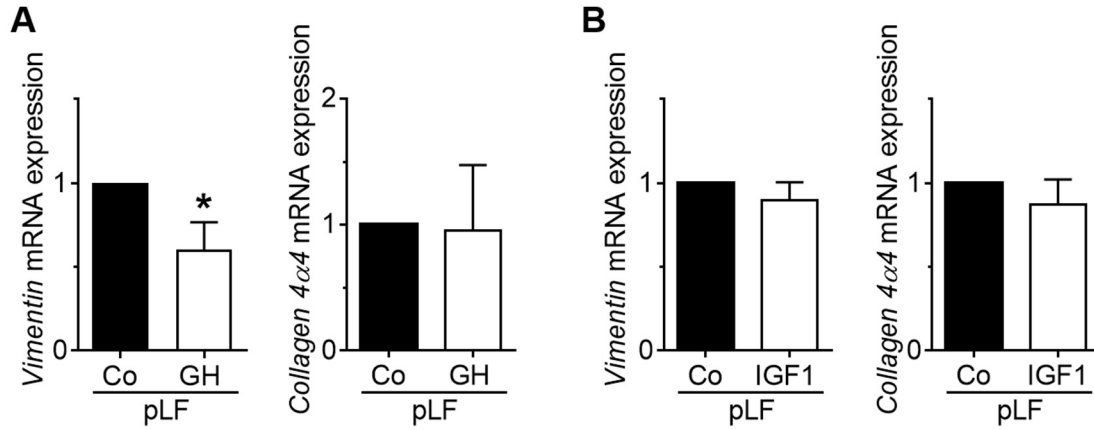

**Supplementary Figure S2.** Functional role of Growth Hormone (GH) and Insulin-like growth factor (IGF-1) in gene expression of primary neonatal lung fibroblasts (pLF). A, B: pLF were stimulated for 24 h with either GH (100 nmol/l) (A) or IGF-1 (10 ng/ml) (B), and their respective vehicles (10 mmol sodium bicarbonate or dH<sub>2</sub>O). Gene expression of Vimentin (*Vim*) and Collagen 4α4 (*Col4a4*) was analyzed; β-Actin served as housekeeping gene. Data are presented as mean±SEM. \*p<0.05 (Unpaired t test); n=6/group.

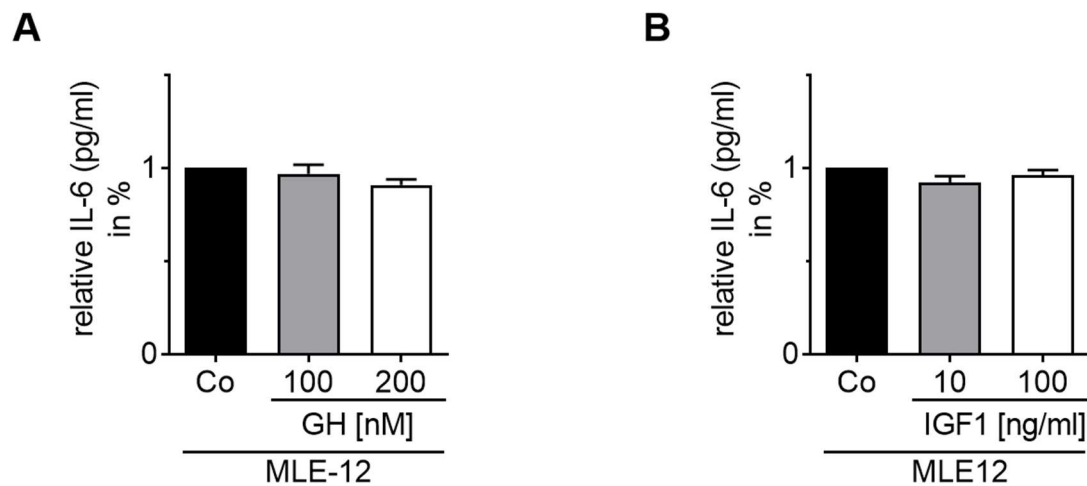

**Supplementary Figure S3.** A, B. Functional role of Growth Hormone (GH) (A) and Insulin-like growth factor (IGF-1) (B) on IL-6 secretion of murine lung epithelial cells (MLE-12). IL-6 protein abundance in cell supernatant was measured with ELISA, data are presented as mean $\pm$ SEM. (RM One-way ANOVA with Bonferroni post-test); n=4/group.

**Supplementary Table S1.** List of primers used for real-time RT-PCR; \*SYBR-Green primer.

|                                        |                                                   |
|----------------------------------------|---------------------------------------------------|
| <i>A-smooth muscle actin (Acta 2)</i>  | Forward, ACATCAGGGAGTAATGGTTGGAAT                 |
|                                        | Reverse, GGTGCCAGATCTTTTCCATGTC                   |
|                                        | Probe (FAM), CGATAGAACACGGCATCATCACCAACTG (TAMRA) |
| * <i>Actb</i>                          | Forward, TGACAGGATGCAGAAGGAGATTACT                |
|                                        | Reverse, GCCACCGATCCACACAGAGT                     |
| <i>Actb</i>                            | Forward, TGACAGGATGCAGAAGGAGATTACT                |
|                                        | Reverse, GCCACCGATCCACACAGAGT                     |
|                                        | Probe (FAM), ATCAAGATCATTGCTCCTCCTGAGCGC (TAMRA)  |
| * <i>Collagen 1a1 (Coll1a1)</i>        | Forward, GCAGTGCTGTTGCGATCTTG                     |
|                                        | Reverse, CAGAGGGACAGAGCACAGCTT                    |
| <i>Collagen 4a4 (Col4a4)</i>           | Forward, GAAGGCGCACAAATCAAGATCT                   |
|                                        | Reverse, CACACTTGGTGGATGTTGCAGTA                  |
|                                        | Probe (FAM), CTTCTGTGTTTAGCACTCTGCCCTTTGC         |
| * <i>Collagen 6a1 (Col6a1)</i>         | Forward, GGTGGCCACACAGGACATC                      |
|                                        | Reverse, GGTGTGCGAGCACGAAGAATAGA                  |
| * <i>Growth hormone receptor (Ghr)</i> | Forward, CAAAAATGTTTCACTGTTGACGAAA                |
|                                        | Reverse, GAATCCCGGTCAAATAATGTTTAG                 |
|                                        | Forward, CGGAGGACCAGGTGGAGAT                      |

|                                                          |                                              |
|----------------------------------------------------------|----------------------------------------------|
| <i>*Homeodomain-only protein homeobox (Hox)</i>          | Reverse, GCGCTGCTTAAACCATTTCTG               |
| <i>*Insulin growth factor binding protein 2 (Igfbp2)</i> | Forward, GCCCCCTGGAACATCTCTACT               |
|                                                          | Reverse, AGAGACATCTTGCACTGCTTAAGGT           |
| <i>Insulin-like growth factor 1 (Igf1)</i>               | Forward, GCTGGTGGATGCTCTTCAGTT               |
|                                                          | Reverse, GGTGCCCTCCGAATGCT                   |
|                                                          | Probe (FAM), TTTTACTTCAACAAGCCCACAGGCTATGGC  |
| <i>*Insulin-like growth factor 1 receptor (Igf1r)</i>    | Forward, GCTTCCTGTGAAAGTGATGTTCTC            |
|                                                          | Reverse, CGTTTTTAAATGGTGCCTCCTT              |
| <i>Interleukin 6 (Il6)</i>                               | Forward, ACAAGTCGGAGGCTTAATTACACAT           |
|                                                          | Reverse, AATCAGAATTGCCATTGCACAA              |
|                                                          | Probe (FAM), TCTTTTCTCATTTCCACGATTTCCCAGAGAA |
| <i>*Vimentin (Vim)</i>                                   | Forward, CCCTGAACCTGAGAGAACTAACC             |
|                                                          | Reverse, GTCTCATTGATCACCTGTCCATCT            |
| <i>*Zonula occludens 1 (Tjp1)</i>                        | Forward, CCTGTCCCTCAGAGTCAGTTTAGTG           |
|                                                          | Reverse, CAATATCTTCGGGTGGCTTCA               |
